# Supplementary material for: The effects of in-hospital deprescribing on potential prescribing omission in hospitalized elderly patients with polypharmacy
Source: PubMed Central journal article supplement (PMC8076214; doi:10.1038/s41598-021-88362-w), 2021-04-26
Supplement: 41598_2021_88362_MOESM1_ESM.pdf [file 41598_2021_88362_MOESM1_ESM.pdf]

**The effects of in-hospital deprescribing on potential prescribing omission in hospitalized elderly patients with polypharmacy.**

**Authors:**

**Miho Kaminaga**

Department of Pharmacy, National Hospital Organization Tochigi Medical Center, 1-10-37, Nakatomatsuri, Utsunomiya, Tochigi, Japan.

**Junpei Komagamine**

Department of Internal Medicine, National Hospital Organization Tochigi Medical Center, 1-10-37, Nakatomatsuri, Utsunomiya, Tochigi, Japan.

**Shinpei Tatsumi**

Department of Pharmacy, National Hospital Organization Tochigi Medical Center, 1-10-37, Nakatomatsuri, Utsunomiya, Tochigi, Japan.

**Table S1.** Characteristics of 121 hospitalised elderly patients who received the in-hospital deprescribing intervention.

| Characteristics <sup>a</sup>        | Total        | Presence of PPOs after the deprescribing intervention |              |
|-------------------------------------|--------------|-------------------------------------------------------|--------------|
|                                     |              | Yes (n = 94)                                          | No (n = 27)  |
| Age                                 |              |                                                       |              |
| Median (IQR)                        | 82 (75 – 85) | 82 (77 – 87)                                          | 77 (71 – 82) |
| Mean (SD)                           | 80.5 (7.4)   | 81.4 (7.2)                                            | 77.1 (7.3)   |
| Woman                               | 83 (68.6)    | 66 (70.2)                                             | 17 (63.0)    |
| Location before the index admission |              |                                                       |              |
| Home                                | 104 (86.0)   | 79 (84.0)                                             | 25 (92.6)    |
| Nursing home                        | 15 (12.4)    | 14 (14.9)                                             | 1 (3.7)      |
| Other hospitals                     | 2 (1.7)      | 1 (1.1)                                               | 1 (3.7)      |
| Ambulatory status before admission  |              |                                                       |              |
| Independence                        | 77 (63.6)    | 56 (59.6)                                             | 21 (77.8)    |
| Partial dependence                  | 22 (18.2)    | 19 (20.2)                                             | 3 (11.1)     |
| Dependence                          | 22 (18.2)    | 19 (20.2)                                             | 3 (11.1)     |
| Current smoker                      | 24 (19.8)    | 23 (24.5)                                             | 1 (3.7)      |
| Regular drinker                     | 19 (15.7)    | 14 (14.9)                                             | 5 (18.5)     |
| Charlson Comorbidity Index score    |              |                                                       |              |
| Median (IQR)                        | 2 (1 – 3)    | 2 (1 – 3)                                             | 1 (1 – 2)    |
| Mean (SD)                           | 1.9 (1.6)    | 2.0 (1.6)                                             | 1.5 (1.6)    |
| Past medical history                |              |                                                       |              |
| Hypertension                        | 97 (80.2)    | 72 (76.6)                                             | 25 (92.6)    |
| Dyslipidemia                        | 43 (35.5)    | 30 (31.9)                                             | 13 (48.2)    |
| Diabetes mellitus                   | 25 (20.7)    | 16 (17.0)                                             | 9 (33.3)     |
| Asthma or COPD                      | 5 (4.1)      | 3 (3.2)                                               | 2 (7.4)      |
| Dementia                            | 24 (19.8)    | 22 (23.4)                                             | 2 (7.4)      |
| Haemorrhagic stroke                 | 12 (9.9)     | 10 (10.6)                                             | 2 (7.4)      |
| Ischaemic stroke                    | 18 (14.9)    | 15 (16.0)                                             | 3 (11.1)     |
| Ischaemic heart disease             | 10 (8.3)     | 7 (7.5)                                               | 3 (11.1)     |
| Chronic kidney disease              | 8 (6.6)      | 7 (7.5)                                               | 1 (3.7)      |
| Heart failure                       | 5 (4.1)      | 5 (5.3)                                               | 0 (0.0)      |
| Atrial fibrillation                 | 18 (14.9)    | 14 (14.9)                                             | 4 (14.8)     |
| Osteoporosis                        | 28 (23.1)    | 27 (28.7)                                             | 1 (3.7)      |
| Fracture                            | 45 (37.2)    | 41 (43.6)                                             | 4 (14.8)     |

|                                                                      |              |              |              |
|----------------------------------------------------------------------|--------------|--------------|--------------|
| Rheumatic disease                                                    | 11 (9.1)     | 11 (11.7)    | 0 (0.0)      |
| Depressive disorder                                                  | 8 (6.6)      | 7 (7.5)      | 1 (3.7)      |
| Active cancer                                                        | 10 (8.3)     | 5 (5.3)      | 5 (18.5)     |
| Admission ward                                                       |              |              |              |
| Orthopaedic surgery                                                  | 86 (85.2)    | 83 (88.3)    | 18 (66.7)    |
| General surgery                                                      | 7 (5.8)      | 5 (5.3)      | 2 (7.4)      |
| Others <sup>b</sup>                                                  | 13 (10.7)    | 6 (6.4)      | 7 (25.9)     |
| Estimated GFR <sup>c</sup> , ml/min/1.73m <sup>2</sup>               |              |              |              |
| Median (IQR)                                                         | 65 (48 – 80) | 65 (47 – 79) | 65 (53 – 82) |
| Mean (SD)                                                            | 65 (22)      | 64 (22)      | 67 (22)      |
| Less than 60 ml/min/1.73m <sup>2</sup>                               | 50 (41.3)    | 40 (42.6)    | 10 (37.0)    |
| Number of medications at admission                                   |              |              |              |
| Median (IQR)                                                         | 9 (7 – 11)   | 9 (8 – 11)   | 8 (7 – 10)   |
| Mean (SD)                                                            | 9.1 (2.6)    | 9.3 (2.6)    | 8.4 (2.6)    |
| Five or more medications                                             | 119 (98.4)   | 92 (97.9)    | 27 (100.0)   |
| Number of newly started medications during the index hospitalisation |              |              |              |
| Median (IQR)                                                         | 0 (0 – 2)    | 0 (0 – 1)    | 1 (0 – 2)    |
| Mean (SD)                                                            | 0.8 (1.2)    | 0.8 (1.2)    | 1.0 (1.2)    |
| Number of medications at discharge                                   |              |              |              |
| Median (IQR)                                                         | 5 (3 – 6)    | 4 (3 – 6)    | 5 (3 – 6)    |
| Mean (SD)                                                            | 4.7 (2.5)    | 4.7 (2.6)    | 4.7 (2.2)    |
| Five or more medications                                             | 61 (50.4)    | 46 (48.9)    | 15 (55.6)    |
| In-hospital death                                                    | 1 (0.8)      | 1 (1.1)      | 0 (0.0)      |

<sup>a</sup>Values are expressed as the number with the percentage of the total number, unless otherwise stated.

<sup>b</sup>Include Neurosurgery (n = 5), Oral Surgery (n = 4), Urology (n = 3), Dermatology (n = 3).

<sup>c</sup>Based on the modification of diet in renal disease equation.

COPD: chronic obstructive pulmonary disease; GFR: glomerular filtration rate; IQR: interquartile range; PPO: potential prescribing omission; SD: standard deviation.

**Table S2.** Change in the numbers of all medications, PIMs, and PPOs after the in-hospital deprescribing intervention.

| Characteristics <sup>a</sup>                                                                                                                                                                                                                | In-hospital deprescribing |                         | P-value <sup>b</sup> |
|---------------------------------------------------------------------------------------------------------------------------------------------------------------------------------------------------------------------------------------------|---------------------------|-------------------------|----------------------|
|                                                                                                                                                                                                                                             | Before<br>(At admission)  | After<br>(At discharge) |                      |
| Number of total medications <sup>b</sup>                                                                                                                                                                                                    |                           |                         |                      |
| Mean (SD)                                                                                                                                                                                                                                   | 9.1 (2.6)                 | 4.7 (2.5)               | < 0.001              |
| Five or more medications                                                                                                                                                                                                                    | 119 (98.4)                | 61 (50.4)               | < 0.001              |
| Potentially inappropriate medications <sup>b,c</sup>                                                                                                                                                                                        |                           |                         |                      |
| Any use                                                                                                                                                                                                                                     | 86 (71.1)                 | 52 (43.0)               | < 0.001              |
| Mean (SD)                                                                                                                                                                                                                                   | 1.2 (1.1)                 | 0.6 (0.8)               | < 0.001              |
| STOPP criteria                                                                                                                                                                                                                              |                           |                         |                      |
| Section A: Drug indication                                                                                                                                                                                                                  |                           |                         |                      |
| Any drug prescribed without an evidence-based clinical indication (A1)                                                                                                                                                                      | 4 (3.3)                   | 1 (0.8)                 |                      |
| Any duplicate drug class prescription e.g. two concurrent NSAIDs, SSRIs, loop diuretics, ACE inhibitors, anticoagulants (A3)                                                                                                                | 6 (5.0)                   | 4 (3.3)                 |                      |
| Section B: Cardiovascular system                                                                                                                                                                                                            |                           |                         |                      |
| Loop diuretic as first-line treatment for hypertension (B6)                                                                                                                                                                                 | 6 (5.0)                   | 0 (0.0)                 |                      |
| Coagulation system                                                                                                                                                                                                                          |                           |                         |                      |
| Aspirin plus clopidogrel as secondary stroke prevention, unless the patient has a coronary stent(s) inserted in the previous 12 months or concurrent acute coronary syndrome or has a high grade symptomatic carotid arterial stenosis (C4) | 1 (0.8)                   | 1 (0.8)                 |                      |
| Antiplatelet agents with vitamin K antagonist, direct thrombin inhibitor or factor Xa inhibitors in patients with stable coronary, cerebrovascular or peripheral arterial disease without a clear indication for anticoagulant therapy (C6) | 1 (0.8)                   | 1 (0.8)                 |                      |
| Ticlopidine in any circumstances (C7)                                                                                                                                                                                                       | 1 (0.8)                   | 1 (0.8)                 |                      |
| NSAID and vitamin K antagonist, direct thrombin inhibitor or factor Xa inhibitors in combination (C10)                                                                                                                                      | 2 (1.7)                   | 0 (0.0)                 |                      |
| NSAID with concurrent antiplatelet agents without PPI prophylaxis (C11)                                                                                                                                                                     | 1 (0.8)                   | 0 (0.0)                 |                      |
| Section D: Central nervous system                                                                                                                                                                                                           |                           |                         |                      |
| Initiation of tricyclic antidepressants as first-line antidepressant treatment (D2)                                                                                                                                                         | 2 (1.7)                   | 1 (0.8)                 |                      |
| Selective serotonin re-uptake inhibitors with current or recent significant hyponatraemia (D4)                                                                                                                                              | 1 (0.8)                   | 1 (0.8)                 |                      |
| Benzodiazepines for $\geq 4$ weeks (D5)                                                                                                                                                                                                     | 15 (12.4)                 | 6 (5.0)                 |                      |
| Anticholinergics or antimuscarinics in patients with delirium or dementia (D8)                                                                                                                                                              | 3 (2.5)                   | 2 (1.7)                 |                      |

|                                                                                                                                                                                                                                                   |           |           |
|---------------------------------------------------------------------------------------------------------------------------------------------------------------------------------------------------------------------------------------------------|-----------|-----------|
| Acetylcholinesterase inhibitors with a known history of persistent bradycardia, heart block or recurrent unexplained syncope or concurrent treatment with drugs that reduce heart rate such as beta-blockers, digoxin, diltiazem, verapamil (D11) | 1 (0.8)   | 2 (1.7)   |
| First-generation antihistamines (D14)                                                                                                                                                                                                             | 2 (1.7)   | 0 (0.0)   |
| Section E: Renal system                                                                                                                                                                                                                           |           |           |
| Digoxin at a long-term dose greater than 125µg/day if eGFR < 30 ml/min/1.73m <sup>2</sup> (E1)                                                                                                                                                    | 1 (0.8)   | 1 (0.8)   |
| NSAIDs if eGFR < 50 ml/min/1.73m <sup>2</sup> (E4)                                                                                                                                                                                                | 3 (2.5)   | 0 (0.0)   |
| Section F: Gastrointestinal system                                                                                                                                                                                                                |           |           |
| PPI for uncomplicated peptic ulcer disease or erosive peptic oesophagitis at full therapeutic dosage for > 8 weeks (F2)                                                                                                                           | 4 (3.3)   | 2 (1.7)   |
| Drugs likely to cause constipation in patients with chronic constipation where non-constipating alternatives are appropriate (F3)                                                                                                                 | 1 (0.8)   | 1 (0.8)   |
| Section G: Respiratory system                                                                                                                                                                                                                     |           |           |
| Theophylline as monotherapy for COPD (G1)                                                                                                                                                                                                         | 1 (0.8)   | 0 (0.0)   |
| Systemic corticosteroids instead of inhaled corticosteroids for maintenance therapy in moderate-severe COPD (G2)                                                                                                                                  | 1 (0.8)   | 0 (0.0)   |
| Section H: Musculoskeletal system                                                                                                                                                                                                                 |           |           |
| Corticosteroids for osteoarthritis (H5)                                                                                                                                                                                                           | 1 (0.8)   | 0 (0.0)   |
| COX-2 selective NSAIDs with concurrent cardiovascular disease (H7)                                                                                                                                                                                | 1 (0.8)   | 0 (0.0)   |
| NSAID with concurrent corticosteroids without PPI prophylaxis (H8)                                                                                                                                                                                | 1 (0.8)   | 1 (0.8)   |
| Oral bisphosphonates in patients with a history of upper gastrointestinal disease i.e. dysphagia, oesophagitis, gastritis, duodenitis, or peptic ulcer disease, or upper gastrointestinal bleeding (H9)                                           | 1 (0.8)   | 1 (0.8)   |
| Section I: Urogenital system                                                                                                                                                                                                                      |           |           |
| Antimuscarinic drugs for overactive bladder syndrome with concurrent dementia or chronic cognitive impairment or narrow-angle glaucoma, or chronic prostatism (I1)                                                                                | 3 (2.5)   | 2 (1.7)   |
| Section J: Endocrine system                                                                                                                                                                                                                       |           |           |
| Sulphonylureas with a long duration of action with type 2 diabetes mellitus (J1)                                                                                                                                                                  | 10 (8.3)  | 4 (3.3)   |
| Section K: Drugs that predictably increase the risk of falls                                                                                                                                                                                      |           |           |
| Benzodiazepines (K1)                                                                                                                                                                                                                              | 52 (43.0) | 24 (19.8) |
| Neuroleptic drugs (K2)                                                                                                                                                                                                                            | 5 (4.1)   | 2 (1.7)   |
| Vasodilator drugs with persistent postural hypotension (K3)                                                                                                                                                                                       | 1 (0.8)   | 1 (0.8)   |
| Hypnotic Z-drugs (K4)                                                                                                                                                                                                                             | 9 (7.4)   | 4 (3.3)   |
| Section L: Analgesic drugs                                                                                                                                                                                                                        |           |           |
| Use of oral or transdermal strong opioids as first line therapy for mild pain (L1)                                                                                                                                                                | 3 (2.5)   | 3 (2.5)   |

**Section M: Antimuscarinic/anticholinergic drug burden**

|                                                                                          |           |           |         |
|------------------------------------------------------------------------------------------|-----------|-----------|---------|
| Concomitant use of two or more drugs with antimuscarinic/anticholinergic properties (M1) | 1 (0.8)   | 1 (0.8)   |         |
| Potential prescribing omissions <sup>b,c</sup>                                           |           |           |         |
| Any occurrence                                                                           | 64 (52.9) | 94 (77.7) | < 0.001 |
| Mean number (SD)                                                                         | 0.5 (0.5) | 2.1 (1.6) | < 0.001 |

**START criteria****Section A: Cardiovascular system**

|                                                                                                                                                                     |         |           |  |
|---------------------------------------------------------------------------------------------------------------------------------------------------------------------|---------|-----------|--|
| Vitamin K antagonists or direct thrombin inhibitors or factor Xa inhibitors in the presence of chronic atrial fibrillation (A1)                                     | 1 (0.8) | 1 (0.8)   |  |
| Aspirin in the presence of chronic atrial fibrillation, where Vitamin K antagonists or direct thrombin inhibitors or factor Xa inhibitors are contraindicated (A2)  | 1 (0.8) | 1 (0.8)   |  |
| Antiplatelet therapy with a documented history of coronary, cerebral or peripheral vascular disease (A3)                                                            | 9 (7.4) | 13 (10.7) |  |
| Statin therapy with a documented history of coronary, cerebral or peripheral vascular disease, unless the patient's status is end-of-life or age is > 85 years (A5) | 8 (6.6) | 11 (9.1)  |  |
| ACE inhibitor with systolic heart failure and/or documented coronary artery disease (A6)                                                                            | 5 (4.1) | 5 (4.1)   |  |
| Beta-blocker with ischaemic heart disease (A7)                                                                                                                      | 4 (3.3) | 8 (6.6)   |  |

**Section B: Respiratory system**

|                                                                                                             |         |         |  |
|-------------------------------------------------------------------------------------------------------------|---------|---------|--|
| Regular inhaled $\beta$ 2 agonist or antimuscarinic bronchodilator for mild to moderate asthma or COPD (B1) | 1 (0.8) | 0 (0.0) |  |
|-------------------------------------------------------------------------------------------------------------|---------|---------|--|

**Section C: Central nervous system & Ophthalmic system**

|                                                                                                  |         |         |  |
|--------------------------------------------------------------------------------------------------|---------|---------|--|
| Acetylcholinesterase inhibitor for mild-moderate Alzheimer's dementia or Lewy body dementia (C3) | 3 (2.5) | 4 (3.3) |  |
|--------------------------------------------------------------------------------------------------|---------|---------|--|

**Section D: Gastrointestinal system**

|                                                                          |         |         |  |
|--------------------------------------------------------------------------|---------|---------|--|
| Fibre supplements for diverticulosis with a history of constipation (D2) | 4 (3.3) | 3 (2.5) |  |
|--------------------------------------------------------------------------|---------|---------|--|

**Section E: Musculoskeletal system**

|                                                                                                                                                             |           |           |  |
|-------------------------------------------------------------------------------------------------------------------------------------------------------------|-----------|-----------|--|
| Bisphosphonates and vitamin D and calcium in patients taking long-term systemic corticosteroid therapy (E2)                                                 | 9 (7.4)   | 9 (7.4)   |  |
| Vitamin D and calcium supplement in patients with known osteoporosis or previous fragility fractures (E3)                                                   | 34 (28.1) | 72 (59.5) |  |
| Bone anti-resorptive or anabolic therapy in patients with documented osteoporosis, where no pharmacological or clinical status contraindication exists (E4) | 23 (19.0) | 59 (48.8) |  |
| Vitamin D supplement in older people who are housebound or experiencing falls or with osteopenia (E5)                                                       | 14 (11.6) | 44 (36.4) |  |

|                                                                                                                                             |         |         |
|---------------------------------------------------------------------------------------------------------------------------------------------|---------|---------|
| Xanthine-oxidase inhibitors with a history of recurrent episodes of gout (E6)                                                               | 1 (0.8) | 1 (0.8) |
| Folic acid supplement in patients taking methotrexate (E7)                                                                                  | 2 (1.7) | 1 (0.8) |
| <b>Section F: Endocrine system</b>                                                                                                          |         |         |
| ACE inhibitor or ARB in diabetes with evidence of renal disease or microalbuminuria with or without serum biochemical renal impairment (F1) | 5 (4.1) | 8 (6.6) |
| <b>Section G: Urogenital system</b>                                                                                                         |         |         |
| 5-alpha reductase inhibitor with symptomatic prostatism, where prostatectomy is not considered necessary (G2)                               | 7 (5.8) | 8 (6.6) |

---

<sup>a</sup>Values are expressed as the number with the percentage of the total number, unless otherwise stated.

<sup>b</sup>Comparisons between the time at admission and discharge were performed by using Fisher's exact test and Student's t-test for categorical and continuous variables, respectively. The level of statistical significance was set at 5%.

<sup>c</sup>Based on the 2015 STOPP/START criteria.

ACE, angiotensin-converting-enzyme; ARB, angiotensin II receptor blocker; COPD, chronic obstructive pulmonary disease; COX, cyclooxygenase; NSAIDs, non-steroidal anti-inflammatory drugs; SD, standard deviation; SSRI, selective serotonin reuptake inhibitors; STOPP/START criteria, screening tool of older people's prescriptions and screening tool to alert to right treatment criteria.
